# Supplementary material
Source: Frontiers journal article supplement (https://www.frontiersin.org/articles/229142)
Supplement: Data_Sheet_5.XLS [file Data_Sheet_5.XLS]

## Sheet: Sheet9
Gene number	Cd_readcount	CK_readcount	log2.Fold_change.	p.value	q.value.Storey.et.al..2003.	Signature	Cd_readcount	Zn_readcount	log2.Fold_change.	p.value	q.value.Storey.et.al..2003.	Signature	Zn+Cd_readcount	CK_readcount	log2.Fold_change.	p.value	q.value.Storey.et.al..2003.	Signature	Zn+Cd_readcount	Cd_readcount	log2.Fold_change.	p.value	q.value.Storey.et.al..2003.	Signature	Zn+Cd_readcount	Zn_readcount	log2.Fold_change.	p.value	q.value.Storey.et.al..2003.	Signature	Zn_readcount	CK_readcount	log2.Fold_change.	p.value	q.value.Storey.et.al..2003.	Signature	Gene Length	NR ID	NR Score	NR Evalue	NR Description	NT ID	NT Score	NT Evalue	NT Description	KO ID	KO Name	KO Description	Http Link
comp250011_c0	0	23.7914	-6.4031	3.4511e-07	4.1427e-05	TRUE	0	2.46218	-2.9615	0.11984	0.99618	FALSE	28.3946	25.194	0.17254	0.48544	0.99628	FALSE	29.0146	0	6.7007	2.5049e-08	1.713e-06	TRUE	28.6034	2.91031	3.2969	5.6563e-07	5.3681e-05	TRUE	2.80846	24.4947	-3.1246	1.1842e-05	0.00091441	TRUE	710	--	--	--	--	--	--	--	--	--	--	--	--
comp224776_c0	0	15.5136	-6.0492	3.5244e-05	0.0027488	TRUE	0	0	-0.56158	0.78855	0.99618	FALSE	1.91963	16.4282	-3.0973	0.00050255	0.014689	FALSE	1.96155	0	3.077	0.20928	0.99397	FALSE	1.93375	0	2.0732	0.30512	0.99427	FALSE	0	15.9722	-5.1707	3.8327e-05	0.0025926	TRUE	1294	--	--	--	--	--	--	--	--	--	--	--	--
comp259986_c0	8.75827	59.9189	-2.7743	2.8115e-11	5.918e-09	TRUE	9.8479	21.8356	-1.1488	0.0034675	0.083687	FALSE	31.194	63.4514	-1.0244	0.0025735	0.058198	FALSE	31.8752	8.69036	1.8749	0.00012828	0.0040995	TRUE	31.4235	25.8098	0.28392	0.33917	0.99427	FALSE	24.9066	61.6903	-1.3085	7.8176e-05	0.0049329	TRUE	1916	XP_003565719.1	195	3.34263e-13	PREDICTED: uncharacterized protein LOC100835008 [Brachypodium distachyon]	AK289028.1	285	1.41792e-145	Oryza sativa Japonica Group cDNA, clone: J090090M16, full insert sequence	--	--	--	--
comp243729_c0	7.77576	40.9356	-2.3963	3.5546e-07	4.2643e-05	TRUE	8.74315	94.5866	-3.4354	3.9683e-24	1.4424e-21	TRUE	51.1206	43.3489	0.23791	0.25205	0.99628	FALSE	52.2369	7.71547	2.7592	7.8355e-10	6.6307e-08	TRUE	51.4966	111.802	-1.1184	9.499e-06	0.0007082	TRUE	107.889	42.1458	1.3561	2.9529e-08	3.7513e-06	TRUE	791	--	--	--	--	AK357048.1	216	1.29946e-107	Hordeum vulgare subsp. vulgare mRNA for predicted protein, complete cds, clone: NIASHv1044P21	--	--	--	--
comp234919_c0	37.3903	170.82	-2.1917	5.1001e-23	2.7206e-20	TRUE	42.0421	74.9021	-0.83317	5.275e-06	0.00030295	FALSE	108.619	180.89	-0.73583	0.00023681	0.0076572	FALSE	110.991	37.1004	1.5809	1.9443e-10	1.7818e-08	TRUE	109.418	88.5347	0.30554	0.059823	0.99427	FALSE	85.4362	175.87	-1.0416	3.083e-08	3.8955e-06	TRUE	3612	--	--	--	--	AK336059.1	217	1.70361e-107	Triticum aestivum cDNA, clone: SET3_C03, cultivar: Chinese Spring	--	--	--	--
comp274010_c0	11.8539	42.1414	-1.8299	1.1548e-05	0.0010137	TRUE	13.3286	82.288	-2.6262	9.4996e-18	2.2848e-15	TRUE	35.9931	44.6258	-0.31016	0.51937	0.99628	FALSE	36.7791	11.762	1.6448	0.00016544	0.0051345	FALSE	36.2579	97.2648	-1.4236	3.9642e-07	3.8746e-05	TRUE	93.8608	43.3872	1.1133	8.8866e-06	0.00070618	TRUE	1247	--	--	--	--	FN564428.1	75	5.00322e-29	Triticum aestivum chromosome 3B-specific BAC library, contig ctg0091b	--	--	--	--
comp269508_c0	30.2302	93.8167	-1.6339	1.2865e-09	2.2566e-07	TRUE	33.9911	13.1059	1.3749	0.027555	0.40193	FALSE	88.0255	99.3475	-0.17456	0.73286	0.99628	FALSE	89.9478	29.9958	1.5843	9.5174e-09	6.9313e-07	TRUE	88.673	15.4913	2.517	8.8216e-15	2.109e-12	TRUE	14.9491	96.5902	-2.6918	7.112e-16	2.2471e-13	TRUE	8131	--	--	--	--	--	--	--	--	--	--	--	--
comp254311_c0	24.507	61.9137	-1.3371	1.8483e-05	0.0015451	TRUE	27.556	150.785	-2.4521	1.6152e-29	7.6221e-27	TRUE	78.145	65.5637	0.25326	0.13993	0.99628	FALSE	79.8515	24.317	1.7154	1.1143e-08	8.0389e-07	TRUE	78.7199	178.229	-1.1789	4.7442e-09	6.184e-07	TRUE	171.991	63.7441	1.432	3.1136e-13	7.6563e-11	TRUE	2038	BAJ97521.1	710	3.25449e-83	predicted protein [Hordeum vulgare subsp. vulgare]	AK332281.1	1086	0	Triticum aestivum cDNA, clone: WT003_J16, cultivar: Chinese Spring	--	--	--	--
comp259193_c1	28.8653	71.561	-1.3098	5.7368e-06	0.0005417	TRUE	32.4565	226.998	-2.8061	1.6993e-48	1.4904e-45	TRUE	111.235	75.7798	0.55373	0.0020468	0.048103	FALSE	113.665	28.6415	1.9886	5.8285e-14	7.8458e-12	TRUE	112.054	268.313	-1.2597	2.808e-14	6.346e-12	TRUE	258.923	73.6766	1.8132	4.1708e-26	2.5975e-23	TRUE	2233	--	--	--	--	AK376425.1	310	2.09814e-159	Hordeum vulgare subsp. vulgare mRNA for predicted protein, complete cds, clone: NIASHv3123N15	--	--	--	--
comp224453_c0	155.995	61.4176	1.3448	5.0366e-10	9.2777e-08	TRUE	175.403	11.8509	3.8876	4.3891e-31	2.2135e-28	TRUE	67.2327	65.0384	0.047872	0.54861	0.99628	FALSE	68.7009	154.786	-1.1719	1.7721e-08	1.2366e-06	TRUE	67.7273	14.0078	2.2735	1.4825e-10	2.3378e-08	TRUE	13.5175	63.2333	-2.2259	5.1452e-09	7.4193e-07	TRUE	538	--	--	--	--	--	--	--	--	--	--	--	--
comp240200_c0	115.773	37.2251	1.637	4.0365e-10	7.4921e-08	TRUE	130.177	9.54613	3.7694	6.8812e-23	2.2897e-20	TRUE	20.8536	39.4196	-0.91862	0.032165	0.42561	FALSE	21.309	114.876	-2.4305	1.7046e-16	2.8397e-14	TRUE	21.007	11.2836	0.89665	0.059921	0.99427	FALSE	10.8887	38.3256	-1.8155	7.0513e-05	0.004494	TRUE	768	NP_001147708.1	172	2.03025e-12	loricrin [Zea mays]	AK252185.1	410	0	Hordeum vulgare subsp. vulgare cDNA clone: FLbaf146n03, mRNA sequence	--	--	--	--
comp230726_c0	203.977	59.1577	1.7858	8.5266e-19	3.3539e-16	TRUE	229.354	142.289	0.68876	0.056823	0.65488	FALSE	98.3012	62.6453	0.65	0.0010803	0.028076	FALSE	100.448	202.396	-1.0107	1.3428e-08	9.5706e-07	TRUE	99.0243	168.186	-0.7642	0.00014316	0.0079148	FALSE	162.3	60.9066	1.414	2.2955e-12	5.0847e-10	TRUE	1946	--	--	--	--	AK330510.1	80	1.31037e-31	Triticum aestivum cDNA, clone: SET4_K02, cultivar: Chinese Spring	--	--	--	--
comp270491_c0	161.075	45.0936	1.8367	9.8756e-16	3.1317e-13	TRUE	181.115	98.9796	0.8717	0.0073114	0.15073	FALSE	49.1106	47.752	0.040472	0.6255	0.99628	FALSE	50.183	159.826	-1.6712	3.8556e-14	5.2686e-12	TRUE	49.4718	116.994	-1.2418	6.9896e-07	6.527e-05	TRUE	112.9	46.4267	1.282	5.4533e-08	6.6149e-06	TRUE	964	BAK01809.1	161	9.47039e-10	predicted protein [Hordeum vulgare subsp. vulgare]	--	--	--	--	--	--	--	--
comp269682_c0	131.382	30.1589	2.1231	1.1158e-15	3.5326e-13	TRUE	147.727	5.05395	4.8694	1.2682e-30	6.3167e-28	TRUE	16.4768	31.9369	-0.95478	0.045371	0.5463	FALSE	16.8367	130.363	-2.9529	1.4868e-22	3.7191e-20	TRUE	16.598	5.97379	1.4743	0.016101	0.40014	FALSE	5.76473	31.0505	-2.4293	1.5822e-05	0.0011812	TRUE	329	--	--	--	--	--	--	--	--	--	--	--	--
comp256279_c0	105.1	12.4456	3.0781	6.155e-19	2.4508e-16	TRUE	118.176	52.0271	1.1836	0.00064277	0.02124	FALSE	28.6401	13.1793	1.1198	0.0082526	0.15073	FALSE	29.2655	104.285	-1.8333	6.4724e-11	6.2602e-09	TRUE	28.8508	61.4964	-1.0919	0.0013046	0.052906	FALSE	59.3442	12.8135	2.2114	9.0894e-09	1.2712e-06	TRUE	1292	BAJ95912.1	1329	2.20171e-180	predicted protein [Hordeum vulgare subsp. vulgare]	AK331323.1	1231	0	Triticum aestivum cDNA, clone: WT007_D11, cultivar: Chinese Spring	--	--	--	--
comp149333_c0	43.3856	1.44716	4.9059	2.3431e-11	4.9914e-09	TRUE	48.7833	46.405	0.072108	0.2638	0.99618	FALSE	15.6778	1.53248	3.3548	0.00017482	0.0058473	FALSE	16.0202	43.0492	-1.4261	0.00049941	0.01334	FALSE	15.7931	54.8509	-1.7962	5.0994e-06	0.00040319	TRUE	52.9313	1.48995	5.1508	4.2022e-14	1.1375e-11	TRUE	1490	--	--	--	--	--	--	--	--	--	--	--	--
comp111423_c0	65.7496	0	9.1495	1.3762e-13	3.7686e-11	TRUE	73.9296	21.5655	1.7774	1.8401e-05	0.000938	TRUE	0	0	NA	NA	NA	NA	0	65.2398	-7.0277	2.7219e-16	4.457e-14	TRUE	0	25.4905	-5.6719	2.2399e-07	2.2625e-05	TRUE	24.5984	0	7.6891	7.6046e-07	7.5122e-05	TRUE	500	--	--	--	--	--	--	--	--	--	--	--	--
comp197833_c0	18.9756	101.058	-2.413	9.6897e-16	3.0878e-13	TRUE	21.3363	204.233	-3.2588	1.4475e-48	1.2836e-45	TRUE	91.3249	107.015	-0.22874	0.53852	0.99628	FALSE	93.3192	18.8284	2.3093	8.9101e-14	1.1818e-11	TRUE	91.9967	241.404	-1.3918	4.4185e-15	1.0827e-12	TRUE	232.956	104.045	1.1628	4.3983e-13	1.0693e-10	TRUE	1428	BAJ97467.1	1917	0	predicted protein [Hordeum vulgare subsp. vulgare]	AK366264.1	892	0	Hordeum vulgare subsp. vulgare mRNA for predicted protein, complete cds, clone: NIASHv2041I24	K05894	E1.3.1.42	12-oxophytodienoic acid reductase	http://www.genome.jp/dbget-bin/www_bget?ko:K05894
comp242258_c0	12.499	91.9753	-2.8794	4.547e-17	1.5895e-14	TRUE	14.0541	189.339	-3.7519	7.4394e-49	6.6701e-46	TRUE	82.1738	97.3976	-0.24521	0.50832	0.99628	FALSE	83.9683	12.4021	2.7593	6.4352e-15	9.3422e-13	TRUE	82.7783	223.8	-1.4349	9.84e-15	2.3418e-12	TRUE	215.967	94.6944	1.1895	1.2702e-12	2.9424e-10	TRUE	1356	AAD03604.1	373	8.43913e-39	small heat shock protein Hsp23.5 [Triticum aestivum]	AF104107.1	264	4.70002e-134	Triticum aestivum small heat shock protein Hsp23.5 mRNA, nuclear gene encoding mitochondrial protein, complete cds	K13993	HSP20	HSP20 family protein	http://www.genome.jp/dbget-bin/www_bget?ko:K13993
comp263325_c1	279.955	71.8898	1.9613	1.4679e-28	1.0826e-25	TRUE	314.785	154.167	1.0299	4.2848e-06	0.00025076	TRUE	142.066	76.128	0.90006	5.3515e-07	3.1765e-05	FALSE	145.168	277.785	-0.93625	4.8425e-10	4.2212e-08	FALSE	143.111	182.227	-0.3486	0.096001	0.99427	FALSE	175.849	74.0152	1.2484	2.9699e-11	5.7487e-09	TRUE	1002	BAJ94669.1	722	1.26758e-92	predicted protein [Hordeum vulgare subsp. vulgare]	AK357500.1	540	0	Hordeum vulgare subsp. vulgare mRNA for predicted protein, complete cds, clone: NIASHv1054O05	K02958	RP-S15e, RPS15	small subunit ribosomal protein S15e	http://www.genome.jp/dbget-bin/www_bget?ko:K02958
comp253076_c0	412.404	68.4855	2.5902	4.6631e-58	1.1349e-54	TRUE	463.712	125.287	1.888	5.8497e-30	2.8014e-27	TRUE	138.682	72.523	0.93527	3.4696e-07	2.1243e-05	FALSE	141.711	409.206	-1.5299	9.1278e-30	3.338e-27	TRUE	139.702	148.09	-0.084113	0.9874	0.9959	FALSE	142.907	70.5102	1.0192	3.2218e-07	3.4162e-05	TRUE	968	3IZR	863	6.0776e-114	Chain U, Localization Of The Large Subunit Ribosomal Proteins Into A 5.5 A Cryo-Em Map Of Triticum Aestivum Translating 80s Ribosome	DQ245989.1	712	0	Zea mays clone 94004 mRNA sequence	K02889	RP-L21e, RPL21	large subunit ribosomal protein L21e	http://www.genome.jp/dbget-bin/www_bget?ko:K02889
comp259929_c0	4.9149	27.2414	-2.4706	2.3992e-05	0.001957	TRUE	5.52637	71.6715	-3.697	2.1794e-19	5.7945e-17	TRUE	24.4009	28.8474	-0.2415	0.7257	0.99628	FALSE	24.9338	4.87679	2.3541	9.7319e-05	0.0032104	TRUE	24.5804	84.716	-1.7851	1.6802e-08	2.0317e-06	TRUE	81.7512	28.0467	1.5434	1.1128e-07	1.282e-05	TRUE	742	BAD11769.1	944	2.03837e-122	tryptophan decarboxylase [Hordeum vulgare]	AB162961.1	514	0	Hordeum vulgare TDC gene for tryptophan decarboxylase, complete cds	K01592	E4.1.1.25	tyrosine decarboxylase	http://www.genome.jp/dbget-bin/www_bget?ko:K01592
comp214626_c0	24.6111	61.3018	-1.3166	2.5095e-05	0.002037	TRUE	27.673	145.456	-2.394	5.6327e-28	2.5321e-25	TRUE	55.303	64.9158	-0.23121	0.62541	0.99628	FALSE	56.5107	24.4202	1.2104	0.00018663	0.0057012	FALSE	55.7098	171.93	-1.6258	6.8737e-14	1.4954e-11	TRUE	165.913	63.1141	1.3944	2.2208e-12	4.9574e-10	TRUE	1148	BAJ88674.1	688	1.3275e-86	predicted protein [Hordeum vulgare subsp. vulgare]	AK251782.1	601	0	Hordeum vulgare subsp. vulgare cDNA clone: FLbaf130k19, mRNA sequence	--	--	--	--
comp232036_c1	7.85916	73.073	-3.2169	3.5485e-15	1.0795e-12	TRUE	8.83693	170.962	-4.274	9.9536e-47	8.2377e-44	TRUE	82.5866	77.381	0.093928	0.389	0.99628	FALSE	84.39	7.79822	3.4359	6.1455e-18	1.174e-15	TRUE	83.1941	202.078	-1.2804	2.186e-11	3.7898e-09	TRUE	195.006	75.2333	1.3741	5.161e-14	1.3839e-11	TRUE	1529	BAJ89938.1	578	1.88951e-68	predicted protein [Hordeum vulgare subsp. vulgare]	AK358726.1	425	0	Hordeum vulgare subsp. vulgare mRNA for predicted protein, complete cds, clone: NIASHv1082C13	--	--	--	--
comp247132_c1	64.8434	167.436	-1.3686	7.9468e-13	2.0199e-10	TRUE	72.9107	381.636	-2.388	1.988e-70	2.9985e-67	TRUE	232.887	177.307	0.39338	0.00052716	0.015314	FALSE	237.972	64.3407	1.887	7.8833e-26	2.4265e-23	TRUE	234.6	451.096	-0.94323	2.5127e-14	5.7033e-12	FALSE	435.309	172.386	1.3364	3.201e-28	2.1661e-25	TRUE	1141	BAJ97923.1	1262	2.19844e-170	predicted protein [Hordeum vulgare subsp. vulgare]	AK335865.1	1132	0	Triticum aestivum cDNA, clone: WT013_P15, cultivar: Chinese Spring	--	--	--	--
comp248197_c0	104.854	41.5081	1.3369	3.9084e-07	4.6515e-05	TRUE	117.899	89.6182	0.39569	0.97865	0.99618	FALSE	51.2702	43.9552	0.22209	0.27275	0.99628	FALSE	52.3898	104.041	-0.98979	6.3548e-05	0.0022078	FALSE	51.6473	105.929	-1.0363	5.6699e-05	0.0034706	TRUE	102.222	42.7352	1.2582	3.4163e-07	3.6047e-05	TRUE	1296	BAJ86897.1	473	9.66196e-154	predicted protein [Hordeum vulgare subsp. vulgare]	AK355679.1	350	0	Hordeum vulgare subsp. vulgare mRNA for predicted protein, complete cds, clone: NIASHv1024E10	--	--	--	--
comp239075_c0	43.7281	115.893	-1.4062	1.2381e-09	2.1757e-07	TRUE	49.1684	405.695	-3.0446	1.8527e-90	4.2715e-87	TRUE	141.599	122.725	0.20638	0.081982	0.84782	FALSE	144.691	43.3891	1.7376	8.6978e-15	1.2485e-12	TRUE	142.641	479.534	-1.7492	6.3648e-40	6.0588e-37	TRUE	462.752	119.319	1.9554	6.5683e-50	9.1048e-47	TRUE	990	CAC94004.1	1022	7.77851e-137	glutathione transferase [Triticum aestivum]	AJ414700.1	795	0	Triticum aestivum mRNA for glutathione transferase (gstu2 gene)	K00799	GST, gst	glutathione S-transferase	http://www.genome.jp/dbget-bin/www_bget?ko:K00799
comp261066_c1	274.188	72.1092	1.9269	2.3068e-27	1.5871e-24	TRUE	308.3	134.659	1.195	2.3746e-08	2.085e-06	TRUE	107.492	76.3604	0.49334	0.0054182	0.10768	FALSE	109.84	272.062	-1.3085	2.9779e-16	4.8554e-14	TRUE	108.283	159.168	-0.55574	0.007713	0.22523	FALSE	153.597	74.241	1.0489	5.9295e-08	7.1361e-06	TRUE	684	ACG30677.1	432	1.31411e-50	histone H4 [Zea mays]	DQ245666.1	296	3.76635e-152	Zea mays clone 18950 mRNA sequence	K11254	H4	histone H4	http://www.genome.jp/dbget-bin/www_bget?ko:K11254
comp259797_c0	174.193	635.05	-1.8662	1.1888e-66	3.3545e-63	TRUE	195.864	1397.43	-2.8349	4.5706e-291	6.7057e-287	TRUE	625.114	672.489	-0.10539	0.97194	0.99628	FALSE	638.765	172.842	1.8858	2.1689e-66	2.7305e-63	TRUE	629.712	1651.77	-1.3913	1.5326e-93	5.1216e-90	TRUE	1593.97	653.825	1.2856	3.3394e-93	1.025e-89	TRUE	3114	BAJ95469.1	741	7.28493e-83	predicted protein [Hordeum vulgare subsp. vulgare]	AK366544.1	452	0	Hordeum vulgare subsp. vulgare mRNA for predicted protein, complete cds, clone: NIASHv2044A19	--	--	--	--
comp269055_c0	81.2908	378.967	-2.2209	9.1772e-50	1.5954e-46	TRUE	91.4043	1121.58	-3.6171	9.7264e-275	1.1212e-270	TRUE	433.685	401.308	0.11194	0.031668	0.42014	FALSE	443.155	80.6605	2.4579	1.2849e-63	1.4619e-60	TRUE	436.875	1325.71	-1.6015	5.6953e-94	1.9447e-90	TRUE	1279.32	390.17	1.7132	3.8153e-113	1.5995e-109	TRUE	2190	BAK01021.1	2850	0	predicted protein [Hordeum vulgare subsp. vulgare]	AK369820.1	1597	0	Hordeum vulgare subsp. vulgare mRNA for predicted protein, complete cds, clone: NIASHv2099B12	--	--	--	--
comp243515_c0	75.6679	154.846	-1.0331	2.287e-08	3.3356e-06	TRUE	85.0819	292.117	-1.7796	1.8989e-41	1.3804e-38	TRUE	175.054	163.975	0.094326	0.20887	0.99628	FALSE	178.877	75.0812	1.2524	9.0168e-12	9.6779e-10	TRUE	176.342	345.284	-0.9694	7.9815e-12	1.4393e-09	FALSE	333.2	159.424	1.0635	6.831e-16	2.1623e-13	TRUE	1304	BAJ98564.1	387	1.92964e-39	predicted protein [Hordeum vulgare subsp. vulgare]	AK367361.1	199	6.13723e-98	Hordeum vulgare subsp. vulgare mRNA for predicted protein, complete cds, clone: NIASHv2055K23	--	--	--	--
comp246991_c0	993.049	419.126	1.2445	4.8971e-49	8.0804e-46	TRUE	1116.6	178.209	2.6475	8.2427e-121	2.8919e-117	TRUE	322.069	443.835	-0.46265	0.00059622	0.016942	FALSE	329.103	985.349	-1.5821	9.5113e-73	1.3782e-69	TRUE	324.439	210.644	0.62314	2.3332e-08	2.7683e-06	FALSE	203.272	431.516	-1.086	2.6693e-19	1.072e-16	TRUE	1727	AER38255.1	239	1.08136e-19	MYB13-1 [Triticum aestivum]	JF288936.1	1181	0	Triticum aestivum MYB13-3 mRNA, complete cds, alternatively spliced	K09422	MYBP	myb proto-oncogene protein, plant	http://www.genome.jp/dbget-bin/www_bget?ko:K09422
comp224938_c0	37.4357	450.301	-3.5884	1.8737e-92	9.1207e-89	TRUE	42.0932	896.031	-4.4119	2.4737e-239	2.2179e-235	TRUE	631.01	476.848	0.40413	5.8814e-09	4.7544e-07	FALSE	644.79	37.1455	4.1176	7.941e-142	3.388e-138	TRUE	635.652	1059.11	-0.73655	3.4761e-20	1.274e-17	FALSE	1022.05	463.613	1.1405	1.6623e-50	2.4214e-47	TRUE	834	Q42831.1	856	1.17688e-113	RecName: Full=Non-symbiotic hemoglobin; AltName: Full=HORvu GLB1; AltName: Full=Non-legume hemoglobin	DQ245217.1	573	0	Zea mays clone 13853 mRNA sequence	--	--	--	--
comp265221_c0	139.083	48.2062	1.5287	7.8882e-11	1.5867e-08	TRUE	156.387	14.3195	3.4491	5.3366e-25	2.0312e-22	TRUE	48.5499	51.0481	-0.072389	0.91683	0.99628	FALSE	49.6101	138.005	-1.476	1.5358e-10	1.4219e-08	TRUE	48.907	16.9257	1.5308	2.2401e-05	0.0015225	TRUE	16.3334	49.6313	-1.6034	3.5087e-05	0.0024018	TRUE	3033	BAJ95204.1	3148	0	predicted protein [Hordeum vulgare subsp. vulgare]	AK332829.1	2314	0	Triticum aestivum cDNA, clone: WT004_P17, cultivar: Chinese Spring	--	--	--	--
comp245565_c0	10.6357	44.6305	-2.0691	1.0732e-06	0.00011752	TRUE	11.9589	9.00639	0.40906	0.98985	0.99657	FALSE	20.2361	47.2616	-1.2237	0.0022364	0.051815	FALSE	20.678	10.5532	0.97042	0.056912	0.56673	FALSE	20.385	10.6456	0.93725	0.055275	0.97724	FALSE	10.273	45.9499	-2.1612	1.0148e-06	9.7498e-05	TRUE	1637	EEC76363.1	144	2.81047e-125	hypothetical protein OsI_13952 [Oryza sativa Indica Group]	AK330203.1	323	9.07575e-167	Triticum aestivum cDNA, clone: SET1_E13, cultivar: Chinese Spring	K00472	E1.14.11.2	prolyl 4-hydroxylase	http://www.genome.jp/dbget-bin/www_bget?ko:K00472
comp271926_c0	14.2902	47.9879	-1.7476	5.5932e-06	0.00053019	TRUE	16.0681	104.189	-2.6969	1.6771e-22	5.4489e-20	TRUE	53.9097	50.817	0.085233	0.50529	0.99628	FALSE	55.0869	14.1794	1.9579	2.2454e-07	1.3128e-05	TRUE	54.3062	123.152	-1.1813	1.0828e-06	9.6965e-05	TRUE	118.842	49.4066	1.2663	3.2994e-08	4.1365e-06	TRUE	1266	P04399.1	784	7.26295e-99	RecName: Full=Protein synthesis inhibitor II; AltName: Full=Ribosome-inactivating protein II; AltName: Full=rRNA N-glycosidase	FP091833.1	299	1.53139e-153	Phyllostachys edulis cDNA clone: bphylf023j20, full insert sequence	--	--	--	--
comp262967_c0	27.4771	68.5799	-1.3196	8.0332e-06	0.00073294	TRUE	30.8955	26.9168	0.19889	0.59289	0.99618	FALSE	41.4321	72.6229	-0.80968	0.010238	0.17916	FALSE	42.3368	27.264	0.63491	0.053736	0.54325	FALSE	41.7368	31.8158	0.39158	0.16158	0.99427	FALSE	30.7023	70.6073	-1.2015	7.9177e-05	0.0049814	TRUE	2984	BAJ94879.1	3154	0	predicted protein [Hordeum vulgare subsp. vulgare]	AK363676.1	94	3.3331e-39	Hordeum vulgare subsp. vulgare mRNA for predicted protein, complete cds, clone: NIASHv2018A10	K00895	E2.7.1.90, pfk	pyrophosphate--fructose-6-phosphate 1-phosphotransferase	http://www.genome.jp/dbget-bin/www_bget?ko:K00895
comp231253_c0	12.6204	44.5593	-1.82	6.9857e-06	0.0006434	TRUE	14.1905	10.2018	0.4761	0.89798	0.99618	FALSE	16.4768	47.1862	-1.5179	0.00024802	0.0079735	FALSE	16.8367	12.5225	0.42708	0.38274	0.99397	FALSE	16.598	12.0586	0.46095	0.31727	0.99427	FALSE	11.6366	45.8766	-1.9791	3.9803e-06	0.00033902	TRUE	1309	BAJ87652.1	1393	0	predicted protein [Hordeum vulgare subsp. vulgare]	AK250401.1	993	0	Hordeum vulgare subsp. vulgare cDNA clone: FLbaf76i22, mRNA sequence	--	--	--	--
comp98095_c0	4.3105	27.0909	-2.6519	1.2184e-05	0.0010638	TRUE	4.84677	3.23971	0.58116	0.85984	0.99618	FALSE	8.55836	28.688	-1.745	0.0014344	0.035779	FALSE	8.74525	4.27707	1.0319	0.19374	0.99397	FALSE	8.62131	3.82935	1.1708	0.14116	0.99427	FALSE	3.69534	27.8918	-2.9161	6.1638e-06	0.00050235	TRUE	2625	BAH56559.1	3472	0	ent-copalyl diphosphate synthase [Triticum aestivum]	AB439589.1	1452	0	Triticum aestivum TaCPS2 mRNA for ent-copalyl diphosphate synthase, complete cds	K14043	CPS4	syn-copalyl-diphosphate synthase	http://www.genome.jp/dbget-bin/www_bget?ko:K14043
comp217230_c0	18.5023	51.7997	-1.4852	2.4221e-05	0.0019741	TRUE	20.8042	14.4472	0.52609	0.79762	0.99618	FALSE	21.4359	54.8535	-1.3556	0.00032144	0.0099802	FALSE	21.904	18.3589	0.25472	0.51735	0.99397	FALSE	21.5936	17.0766	0.33858	0.36691	0.99427	FALSE	16.479	53.3311	-1.6944	8.0176e-06	0.00064217	TRUE	1830	BAJ98237.1	2479	0	predicted protein [Hordeum vulgare subsp. vulgare]	AK367034.1	1328	0	Hordeum vulgare subsp. vulgare mRNA for predicted protein, complete cds, clone: NIASHv2050F02	--	--		--
comp263684_c1	46.8757	94.6149	-1.0132	1.6763e-05	0.0014111	TRUE	52.7076	192.829	-1.8712	2.6853e-29	1.2635e-26	TRUE	89.9204	100.193	-0.15606	0.79835	0.99628	FALSE	91.884	46.5122	0.9822	5.0743e-05	0.0017946	FALSE	90.5818	227.925	-1.3313	2.0578e-13	4.298e-11	TRUE	219.949	97.4121	1.175	1.2951e-12	2.988e-10	TRUE	2485	BAK03178.1	1019	9.06471e-128	predicted protein [Hordeum vulgare subsp. vulgare]	AK371980.1	672	0	Hordeum vulgare subsp. vulgare mRNA for predicted protein, complete cds, clone: NIASHv2144G22	--	--	--	--
comp263404_c0	69.7232	158.287	-1.1828	3.8953e-10	7.2507e-08	TRUE	78.3976	367.635	-2.2294	6.2194e-64	8.4346e-61	TRUE	156.216	167.619	-0.10165	0.99537	0.99973	FALSE	159.627	69.1826	1.2062	3.7663e-10	3.3284e-08	TRUE	157.365	434.546	-1.4654	5.1678e-28	3.0981e-25	TRUE	419.338	162.967	1.3635	4.9676e-28	3.3224e-25	TRUE	2280	BAK02172.1	2299	0	predicted protein [Hordeum vulgare subsp. vulgare]	AK332955.1	1180	0	Triticum aestivum cDNA, clone: WT005_E16, cultivar: Chinese Spring	--	--	--	--
[truncated: 14 more columns]
